# Supplementary material for: Surface display for metabolic engineering of industrially important acetic acid bacteria
Source: PeerJ. 2018 Apr 6;6:e4626. doi: 10.7717/peerj.4626 (PMC5890722; doi:10.7717/peerj.4626)
Supplement: Supplemental Information 1 — Raw data for Figs. 1–7. [file peerj-06-4626-s001.xlsx]

## Sheet: Fig 1
p264-oprF-ST	p264-oprF-phoA	p452-oprF-ST	p452-oprF-phoA
0.0189798	1.19159	0.0198598	0.204678
0.0189798	1.1764	0.0198598	0.203509
0.0177936	1.19393	0.0221963	0.20117
0.0237248	1.17757	0.0245327	0.2
0.0213523	1.17874	0.0233645	0.203509
0.0189798	1.1472	0.0198598	0.188304
0.0189798	1.14369	0.021028	0.188304
0.0189798	1.18458	0.0116822	0.196491

## Sheet: Fig 2
p264-oprF-ST	p264-oprF-phoA	p452-oprF-ST	p452-oprF-phoA
-0.0292553	0.349162	-0.0445545	0.202086
-0.0292553	0.365922	-0.0519802	0.199478
-0.0292553	0.361732	-0.0210396	0.212516
-0.0305851	0.372905	-0.0259901	0.215124
-0.0219941	0.388579	-0.0161491	0.175904
-0.00439883	0.360724	-0.0173913	0.174699
0.0146628	0.391365	-0.0136646	0.179518
-0.00146628	0.39415	-0.0173913	0.185542
-0.00614251	0.425569	0.00951248	0.212401
-0.017199	0.422067	-0.0154578	0.211082
0.0036855	0.420315	-0.0356718	0.211082
-0.0208845	0.402802	-0.0475624	0.21372

## Sheet: Fig 3
SN Untreated	SN Treated
0.135289	0.133333
0.125333	0.132978
0.128711	0.134756
0.142756	0.130311
0.112656	0.163815
0.116934	0.164706
0.112834	0.164706
0.101248	0.173262
0.0789865	0.150808
0.0817824	0.153429
0.0805592	0.155876
0.0826562	0.156051

## Sheet: Fig 4
p264-oprF-phoA	p264-oprF-FL1-phoA	p264-oprF-FL2-phoA	p264-oprF-FL3-phoA	p264-oprF-RL1-phoA	p264-oprF-RL2-phoA	p264-oprF-RL3-phoA
1.12741	1.14301	1.10072	1.07157	1.2213	1.16061	1.22563
1.16988	1.21399	1.14594	1.08569	1.23888	1.19025	1.25162
1.15637	1.21399	1.14183	1.10786	1.27611	1.21128	1.26648
1.19981	1.22338	1.17472	1.1129	1.26887	1.24857	1.27112
1.19841	1.17396	1.13424	1.11645	1.20057	1.17355	1.23792
1.20106	1.20208	1.17378	1.13994	1.23194	1.20169	1.26162
1.23384	1.22917	1.17898	1.15015	1.2462	1.21201	1.27438
1.25952	1.21562	1.13007	1.15424	1.23669	1.22326	1.27621
1.17631	1.13741	1.01934	1.14444	1.21316	1.21353	1.27332
1.23507	1.19258	1.04437	1.16566	1.24189	1.23575	1.29011
1.22388	1.14142	1.03641	1.1697	1.25579	1.24058	1.28078
1.23134	1.13541	1.05461	1.15758	1.30584	1.26763	1.3153

## Sheet: Fig 5
p264-oprF-phoA	p264-oprF-FL1-phoA	p264-oprF-RL1-phoA	p264-oprF-RL2-phoA	p264-oprF-RL3-phoA
0.349162	0.33427	0.60166	0.360241	0.237542
0.365922	0.296348	0.600277	0.356627	0.229236
0.361732	0.299157	0.609959	0.368675	0.259136
0.372905	0.314607	0.650069	0.374699	0.265781
0.388579	0.363755	0.673105	0.286494	0.284314
0.360724	0.372881	0.661218	0.271487	0.292484
0.391365	0.431551	0.658247	0.274216	0.294118
0.39415	0.361147	0.658247	0.305593	0.318627
0.425569	0.456522	0.67663	0.465241	0.251429
0.422067	0.417391	0.690217	0.437166	0.244286
0.420315	0.42029	0.6875	0.43984	0.241429
0.402802	0.44058	0.695652	0.447861	0.264286

## Sheet: Fig 6
Time	Temperature	A1	A2	A3	A4	A5	A6	B1	B2	B3	B4	B5	B6	C1	C2	C3	C4	C5	C6	D1	D2	D3
0	30	-2.74887	-2.59027	-2.63109	-2.63109	-2.67365	-2.70306	-2.53831	-2.59027	-2.60369	-2.73337	-2.65926	-2.73337	-2.74887	-2.79688	-2.73337	-2.73337	-2.7181	-2.76462	-2.74887	-2.67365	-2.60369
6	30	-2.74887	-2.64508	-2.7181	-2.64508	-2.74887	-2.76462	-2.57702	-2.59027	-2.63109	-2.81341	-2.70306	-2.74887	-2.78062	-2.83022	-2.70306	-2.70306	-2.65926	-2.70306	-2.67365	-2.64508	-2.63109
11	30	-2.74887	-2.63109	-2.63109	-2.65926	-2.73337	-2.74887	-2.56395	-2.60369	-2.63109	-2.74887	-2.65926	-2.7181	-2.50104	-2.76462	-2.68825	-2.7181	-2.65926	-2.70306	-2.68825	-2.64508	-2.64508
17	30	-2.73337	-2.63109	-2.64508	-2.68825	-2.7181	-2.7181	-2.56395	-2.6173	-2.64508	-2.76462	-2.65926	-2.76462	-2.81341	-2.81341	-2.74887	-2.65926	-2.70306	-2.74887	-2.67365	-2.65926	-2.60369
22	30	-2.7181	-2.6173	-2.6173	-2.67365	-2.74887	-2.76462	-2.59027	-2.64508	-2.63109	-2.73337	-2.65926	-2.68825	-2.76462	-2.74887	-2.70306	-2.7181	-2.70306	-2.70306	-2.67365	-2.67365	-2.60369
28	30	-2.67365	-2.6173	-2.60369	-2.6173	-2.74887	-2.73337	-2.59027	-2.57702	-2.57702	-2.74887	-2.70306	-2.70306	-2.81341	-2.76462	-2.65926	-2.67365	-2.7181	-2.73337	-2.7181	-2.70306	-2.60369
33	30	-2.65926	-2.65926	-2.64508	-2.67365	-2.70306	-2.68825	-2.56395	-2.6173	-2.6173	-2.78062	-2.63109	-2.67365	-2.70306	-2.76462	-2.70306	-2.7181	-2.74887	-2.67365	-2.73337	-2.65926	-2.60369
39	30	-2.67365	-2.63109	-2.53831	-2.65926	-2.73337	-2.70306	-2.59027	-2.63109	-2.59027	-2.7181	-2.63109	-2.68825	-2.78062	-2.79688	-2.65926	-2.70306	-2.74887	-2.76462	-2.67365	-2.63109	-2.6173
45	30	-2.65926	-2.60369	-2.59027	-2.6173	-2.74887	-2.70306	-2.57702	-2.60369	-2.6173	-2.7181	-2.65926	-2.74887	-2.78062	-2.76462	-2.67365	-2.68825	-2.65926	-2.70306	-2.67365	-2.68825	-2.64508
50	30	-2.60369	-2.53831	-2.60369	-2.56395	-2.64508	-2.68825	-2.53831	-2.60369	-2.55105	-2.7181	-2.64508	-2.70306	-2.74887	-2.74887	-2.67365	-2.7181	-2.65926	-2.74887	-2.67365	-2.64508	-2.59027
56	30	-2.65926	-2.56395	-2.55105	-2.59027	-2.7181	-2.65926	-2.56395	-2.60369	-2.60369	-2.74887	-2.6173	-2.73337	-2.7181	-2.76462	-2.67365	-2.74887	-2.67365	-2.7181	-2.68825	-2.68825	-2.57702
61	30	-2.60369	-2.47694	-2.53831	-2.53831	-2.7181	-2.65926	-2.52573	-2.57702	-2.60369	-2.70306	-2.60369	-2.67365	-2.68825	-2.74887	-2.70306	-2.7181	-2.68825	-2.70306	-2.67365	-2.6173	-2.65926
67	30	-2.65926	-2.47694	-2.56395	-2.60369	-2.63109	-2.7181	-2.53831	-2.6173	-2.6173	-2.70306	-2.63109	-2.7181	-2.76462	-2.70306	-2.64508	-2.64508	-2.6173	-2.68825	-2.65926	-2.59027	-2.64508
72	30	-2.60369	-2.48891	-2.57702	-2.55105	-2.65926	-2.65926	-2.51331	-2.53831	-2.53831	-2.65926	-2.59027	-2.64508	-2.7181	-2.70306	-2.6173	-2.6173	-2.67365	-2.63109	-2.65926	-2.60369	-2.51331
78	30	-2.55105	-2.47694	-2.51331	-2.53831	-2.67365	-2.64508	-2.53831	-2.57702	-2.53831	-2.7181	-2.55105	-2.63109	-2.76462	-2.74887	-2.67365	-2.6173	-2.59027	-2.6173	-2.63109	-2.56395	-2.51331
83	30	-2.57702	-2.4651	-2.48891	-2.55105	-2.68825	-2.64508	-2.47694	-2.56395	-2.55105	-2.70306	-2.59027	-2.6173	-2.70306	-2.67365	-2.6173	-2.60369	-2.63109	-2.6173	-2.6173	-2.59027	-2.52573
89	30	-2.55105	-2.44185	-2.4651	-2.56395	-2.65926	-2.63109	-2.52573	-2.57702	-2.56395	-2.68825	-2.56395	-2.64508	-2.67365	-2.70306	-2.60369	-2.67365	-2.60369	-2.64508	-2.6173	-2.60369	-2.57702
95	30	-2.55105	-2.51331	-2.55105	-2.55105	-2.65926	-2.63109	-2.52573	-2.63109	-2.55105	-2.64508	-2.59027	-2.64508	-2.7181	-2.70306	-2.6173	-2.65926	-2.64508	-2.63109	-2.64508	-2.63109	-2.60369
100	30	-2.57702	-2.51331	-2.52573	-2.57702	-2.67365	-2.67365	-2.51331	-2.59027	-2.59027	-2.68825	-2.56395	-2.65926	-2.70306	-2.68825	-2.68825	-2.68825	-2.65926	-2.65926	-2.63109	-2.60369	-2.51331
106	30	-2.56395	-2.50104	-2.47694	-2.60369	-2.64508	-2.64508	-2.50104	-2.63109	-2.57702	-2.70306	-2.60369	-2.63109	-2.76462	-2.79688	-2.73337	-2.67365	-2.64508	-2.64508	-2.64508	-2.64508	-2.65926
111	30	-2.59027	-2.56395	-2.56395	-2.59027	-2.70306	-2.70306	-2.57702	-2.65926	-2.63109	-2.78062	-2.64508	-2.70306	-2.78062	-2.76462	-2.70306	-2.78062	-2.76462	-2.68825	-2.68825	-2.6173	-2.67365
117	30	-2.64508	-2.57702	-2.57702	-2.64508	-2.74887	-2.73337	-2.59027	-2.73337	-2.6173	-2.79688	-2.78062	-2.78062	-2.81341	-2.79688	-2.81341	-2.7181	-2.73337	-2.73337	-2.70306	-2.65926	-2.59027
122	30	-2.63109	-2.55105	-2.63109	-2.78062	-2.73337	-2.76462	-2.70306	-2.67365	-2.63109	-2.74887	-2.73337	-2.78062	-2.8647	-2.84731	-2.70306	-2.79688	-2.74887	-2.76462	-2.73337	-2.65926	-2.60369
128	30	-2.64508	-2.63109	-2.59027	-2.7181	-2.73337	-2.73337	-2.60369	-2.65926	-2.63109	-2.7181	-2.68825	-2.73337	-2.81341	-2.81341	-2.73337	-2.76462	-2.7181	-2.70306	-2.64508	-2.67365	-2.63109
134	30	-2.55105	-2.59027	-2.50104	-2.65926	-2.7181	-2.70306	-2.56395	-2.60369	-2.60369	-2.65926	-2.64508	-2.68825	-2.73337	-2.76462	-2.68825	-2.63109	-2.67365	-2.64508	-2.68825	-2.6173	-2.60369
139	30	-2.53831	-2.55105	-2.51331	-2.65926	-2.70306	-2.70306	-2.55105	-2.6173	-2.59027	-2.70306	-2.7181	-2.68825	-2.76462	-2.73337	-2.65926	-2.67365	-2.70306	-2.74887	-2.65926	-2.63109	-2.63109
145	30	-2.60369	-2.60369	-2.50104	-2.63109	-2.70306	-2.7181	-2.60369	-2.65926	-2.6173	-2.70306	-2.73337	-2.68825	-2.81341	-2.83022	-2.68825	-2.70306	-2.74887	-2.78062	-2.67365	-2.6173	-2.6173
150	30	-2.60369	-2.47694	-2.51331	-2.60369	-2.65926	-2.65926	-2.55105	-2.60369	-2.60369	-2.70306	-2.67365	-2.70306	-2.79688	-2.74887	-2.64508	-2.65926	-2.70306	-2.73337	-2.64508	-2.59027	-2.55105
156	30	-2.51331	-2.47694	-2.50104	-2.60369	-2.68825	-2.67365	-2.56395	-2.56395	-2.59027	-2.68825	-2.70306	-2.67365	-2.78062	-2.81341	-2.73337	-2.70306	-2.67365	-2.65926	-2.59027	-2.64508	-2.57702
161	30	-2.51331	-2.53831	-2.47694	-2.56395	-2.68825	-2.65926	-2.56395	-2.64508	-2.60369	-2.70306	-2.65926	-2.63109	-2.76462	-2.74887	-2.65926	-2.67365	-2.7181	-2.67365	-2.64508	-2.56395	-2.59027
167	30	-2.50104	-2.48891	-2.41912	-2.55105	-2.6173	-2.60369	-2.48891	-2.55105	-2.55105	-2.67365	-2.70306	-2.64508	-2.73337	-2.68825	-2.73337	-2.6173	-2.63109	-2.60369	-2.59027	-2.56395	-2.51331
173	30	-2.44185	-2.50104	-2.40795	-2.55105	-2.6173	-2.55105	-2.52573	-2.52573	-2.59027	-2.64508	-2.6173	-2.64508	-2.74887	-2.70306	-2.60369	-2.63109	-2.63109	-2.65926	-2.57702	-2.51331	-2.50104
178	30	-2.44185	-2.47694	-2.44185	-2.55105	-2.56395	-2.6173	-2.48891	-2.52573	-2.50104	-2.65926	-2.59027	-2.56395	-2.68825	-2.70306	-2.60369	-2.60369	-2.64508	-2.6173	-2.59027	-2.52573	-2.55105
184	30	-2.47694	-2.37516	-2.44185	-2.59027	-2.60369	-2.59027	-2.50104	-2.52573	-2.51331	-2.64508	-2.64508	-2.63109	-2.70306	-2.65926	-2.60369	-2.64508	-2.59027	-2.60369	-2.53831	-2.53831	-2.50104
189	30	-2.43042	-2.44185	-2.45341	-2.56395	-2.63109	-2.57702	-2.51331	-2.51331	-2.50104	-2.64508	-2.60369	-2.6173	-2.73337	-2.67365	-2.63109	-2.60369	-2.64508	-2.65926	-2.56395	-2.53831	-2.50104
195	30	-2.45341	-2.41912	-2.36446	-2.47694	-2.57702	-2.59027	-2.53831	-2.53831	-2.48891	-2.60369	-2.63109	-2.64508	-2.67365	-2.70306	-2.63109	-2.67365	-2.64508	-2.63109	-2.56395	-2.55105	-2.4651
200	30	-2.45341	-2.36446	-2.44185	-2.55105	-2.56395	-2.57702	-2.45341	-2.56395	-2.47694	-2.63109	-2.64508	-2.60369	-2.76462	-2.65926	-2.60369	-2.6173	-2.6173	-2.67365	-2.56395	-2.55105	-2.56395
206	30	-2.40795	-2.34341	-2.36446	-2.55105	-2.60369	-2.59027	-2.51331	-2.55105	-2.4651	-2.67365	-2.60369	-2.60369	-2.67365	-2.68825	-2.59027	-2.60369	-2.6173	-2.65926	-2.57702	-2.53831	-2.51331
212	30	-2.41912	-2.36446	-2.40795	-2.45341	-2.56395	-2.60369	-2.48891	-2.51331	-2.51331	-2.60369	-2.60369	-2.59027	-2.70306	-2.68825	-2.70306	-2.64508	-2.63109	-2.64508	-2.55105	-2.52573	-2.50104
217	30	-2.47694	-2.33304	-2.41912	-2.47694	-2.57702	-2.55105	-2.53831	-2.57702	-2.50104	-2.6173	-2.64508	-2.6173	-2.74887	-2.70306	-2.7181	-2.63109	-2.59027	-2.67365	-2.53831	-2.50104	-2.57702
223	30	-2.3969	-2.32279	-2.41912	-2.48891	-2.6173	-2.60369	-2.48891	-2.57702	-2.51331	-2.6173	-2.57702	-2.63109	-2.76462	-2.65926	-2.68825	-2.7181	-2.64508	-2.67365	-2.57702	-2.52573	-2.51331
228	30	-2.3969	-2.36446	-2.38597	-2.4651	-2.55105	-2.56395	-2.50104	-2.52573	-2.50104	-2.63109	-2.6173	-2.6173	-2.76462	-2.70306	-2.70306	-2.64508	-2.67365	-2.64508	-2.56395	-2.52573	-2.55105
234	30	-2.3969	-2.3969	-2.35388	-2.50104	-2.55105	-2.53831	-2.47694	-2.53831	-2.52573	-2.63109	-2.64508	-2.6173	-2.70306	-2.63109	-2.64508	-2.65926	-2.63109	-2.60369	-2.55105	-2.53831	-2.50104
239	30	-2.36446	-2.38597	-2.33304	-2.50104	-2.53831	-2.55105	-2.4651	-2.53831	-2.47694	-2.63109	-2.6173	-2.57702	-2.7181	-2.65926	-2.67365	-2.60369	-2.60369	-2.64508	-2.53831	-2.51331	-2.47694
245	30	-2.41912	-2.33304	-2.30259	-2.48891	-2.56395	-2.59027	-2.45341	-2.53831	-2.51331	-2.6173	-2.59027	-2.64508	-2.7181	-2.70306	-2.68825	-2.6173	-2.6173	-2.63109	-2.55105	-2.52573	-2.57702
250	30	-2.35388	-2.32279	-2.34341	-2.48891	-2.57702	-2.57702	-2.53831	-2.55105	-2.52573	-2.65926	-2.64508	-2.64508	-2.76462	-2.76462	-2.70306	-2.63109	-2.73337	-2.65926	-2.55105	-2.57702	-2.57702
256	30	-2.40795	-2.31264	-2.35388	-2.47694	-2.59027	-2.52573	-2.4651	-2.55105	-2.51331	-2.63109	-2.64508	-2.63109	-2.73337	-2.68825	-2.70306	-2.68825	-2.65926	-2.6173	-2.56395	-2.55105	-2.53831
262	30	-2.3969	-2.30259	-2.35388	-2.4651	-2.53831	-2.55105	-2.50104	-2.52573	-2.50104	-2.64508	-2.6173	-2.6173	-2.68825	-2.76462	-2.70306	-2.59027	-2.64508	-2.67365	-2.57702	-2.51331	-2.48891
267	30	-2.38597	-2.29263	-2.35388	-2.50104	-2.57702	-2.55105	-2.53831	-2.56395	-2.52573	-2.70306	-2.67365	-2.64508	-2.73337	-2.68825	-2.7181	-2.64508	-2.65926	-2.67365	-2.6173	-2.53831	-2.59027
273	30	-2.38597	-2.26336	-2.35388	-2.47694	-2.59027	-2.59027	-2.48891	-2.57702	-2.53831	-2.67365	-2.59027	-2.64508	-2.73337	-2.76462	-2.74887	-2.67365	-2.6173	-2.67365	-2.60369	-2.51331	-2.51331
278	30	-2.35388	-2.26336	-2.32279	-2.45341	-2.57702	-2.56395	-2.48891	-2.56395	-2.51331	-2.63109	-2.65926	-2.67365	-2.76462	-2.73337	-2.7181	-2.64508	-2.65926	-2.6173	-2.57702	-2.56395	-2.51331
284	30	-2.33304	-2.36446	-2.29263	-2.4651	-2.6173	-2.57702	-2.56395	-2.51331	-2.50104	-2.65926	-2.64508	-2.64508	-2.78062	-2.7181	-2.70306	-2.64508	-2.64508	-2.67365	-2.60369	-2.53831	-2.55105
289	30	-2.32279	-2.33304	-2.31264	-2.4651	-2.57702	-2.55105	-2.47694	-2.56395	-2.53831	-2.65926	-2.6173	-2.65926	-2.76462	-2.73337	-2.70306	-2.60369	-2.64508	-2.64508	-2.6173	-2.56395	-2.56395
295	30	-2.33304	-2.33304	-2.31264	-2.48891	-2.56395	-2.53831	-2.50104	-2.60369	-2.55105	-2.64508	-2.63109	-2.63109	-2.79688	-2.74887	-2.76462	-2.70306	-2.65926	-2.64508	-2.63109	-2.53831	-2.56395
301	30	-2.29263	-2.28278	-2.30259	-2.44185	-2.59027	-2.52573	-2.51331	-2.55105	-2.48891	-2.6173	-2.64508	-2.6173	-2.76462	-2.73337	-2.67365	-2.6173	-2.67365	-2.65926	-2.60369	-2.56395	-2.53831
306	30	-2.30259	-2.22562	-2.28278	-2.43042	-2.57702	-2.53831	-2.48891	-2.55105	-2.50104	-2.65926	-2.63109	-2.59027	-2.7181	-2.70306	-2.67365	-2.60369	-2.65926	-2.64508	-2.59027	-2.53831	-2.63109
312	30	-2.30259	-2.17156	-2.28278	-2.47694	-2.50104	-2.50104	-2.4651	-2.52573	-2.50104	-2.63109	-2.63109	-2.60369	-2.70306	-2.70306	-2.67365	-2.59027	-2.6173	-2.6173	-2.56395	-2.55105	-2.48891
317	30	-2.24432	-2.12863	-2.22562	-2.37516	-2.48891	-2.4651	-2.45341	-2.51331	-2.47694	-2.59027	-2.57702	-2.59027	-2.68825	-2.67365	-2.70306	-2.64508	-2.6173	-2.6173	-2.53831	-2.55105	-2.53831
323	30	-2.25379	-2.15417	-2.21641	-2.40795	-2.4651	-2.4651	-2.4651	-2.50104	-2.50104	-2.64508	-2.57702	-2.59027	-2.70306	-2.65926	-2.63109	-2.64508	-2.59027	-2.63109	-2.59027	-2.53831	-2.56395
328	30	-2.23493	-2.10373	-2.24432	-2.37516	-2.53831	-2.47694	-2.50104	-2.51331	-2.45341	-2.60369	-2.59027	-2.65926	-2.65926	-2.68825	-2.63109	-2.64508	-2.59027	-2.60369	-2.53831	-2.56395	-2.48891
334	30	-2.22562	-2.07147	-2.17156	-2.35388	-2.44185	-2.45341	-2.44185	-2.52573	-2.47694	-2.63109	-2.60369	-2.56395	-2.63109	-2.64508	-2.64508	-2.63109	-2.60369	-2.57702	-2.60369	-2.57702	-2.53831
340	30	-2.18926	-2.07147	-2.11196	-2.37516	-2.47694	-2.44185	-2.43042	-2.48891	-2.4651	-2.60369	-2.57702	-2.59027	-2.68825	-2.63109	-2.60369	-2.57702	-2.57702	-2.60369	-2.55105	-2.51331	-2.50104
345	30	-2.18926	-2.10373	-2.15417	-2.38597	-2.45341	-2.44185	-2.43042	-2.51331	-2.47694	-2.6173	-2.63109	-2.59027	-2.67365	-2.70306	-2.64508	-2.59027	-2.6173	-2.6173	-2.57702	-2.53831	-2.51331
351	30	-2.17156	-2.12026	-2.18926	-2.38597	-2.48891	-2.40795	-2.51331	-2.48891	-2.51331	-2.65926	-2.63109	-2.6173	-2.74887	-2.73337	-2.63109	-2.63109	-2.65926	-2.60369	-2.57702	-2.57702	-2.52573
356	30	-1.9951	-2.07944	-2.14558	-2.36446	-2.4651	-2.43042	-2.45341	-2.51331	-2.45341	-2.65926	-2.6173	-2.59027	-2.7181	-2.67365	-2.7181	-2.64508	-2.6173	-2.65926	-2.6173	-2.52573	-2.55105
362	30	-2.15417	-2.08747	-2.12863	-2.38597	-2.4651	-2.41912	-2.55105	-2.53831	-2.48891	-2.64508	-2.6173	-2.65926	-2.68825	-2.67365	-2.67365	-2.63109	-2.60369	-2.6173	-2.6173	-2.56395	-2.55105
367	30	-2.12026	-2.07944	-2.07944	-2.36446	-2.44185	-2.41912	-2.45341	-2.47694	-2.45341	-2.63109	-2.59027	-2.63109	-2.8647	-2.83022	-2.78062	-2.76462	-2.76462	-2.74887	-2.68825	-2.60369	-2.68825
373	30	-2.18926	-2.07944	-2.14558	-2.41912	-2.52573	-2.4651	-2.50104	-2.56395	-2.52573	-2.76462	-2.74887	-2.68825	-2.7181	-2.7181	-2.63109	-2.63109	-2.59027	-2.65926	-2.56395	-2.57702	-2.53831
379	30	-2.10373	-2.04794	-2.07147	-2.35388	-2.40795	-2.41912	-2.48891	-2.50104	-2.48891	-2.67365	-2.59027	-2.6173	-2.7181	-2.74887	-2.68825	-2.64508	-2.6173	-2.60369	-2.65926	-2.48891	-2.52573
384	30	-2.12026	-2.10373	-2.07147	-2.37516	-2.45341	-2.47694	-2.55105	-2.6173	-2.55105	-2.67365	-2.67365	-2.63109	-2.76462	-2.78062	-2.68825	-2.64508	-2.6173	-2.67365	-2.67365	-2.52573	-2.59027
390	30	-2.10373	-2.05573	-2.05573	-2.35388	-2.47694	-2.40795	-2.56395	-2.56395	-2.52573	-2.70306	-2.70306	-2.65926	-2.74887	-2.78062	-2.63109	-2.65926	-2.63109	-2.7181	-2.63109	-2.52573	-2.64508
395	30	-2.12863	-2.05573	-2.10373	-2.37516	-2.47694	-2.44185	-2.51331	-2.56395	-2.44185	-2.70306	-2.67365	-2.7181	-2.78062	-2.73337	-2.74887	-2.64508	-2.67365	-2.65926	-2.6173	-2.51331	-2.59027
401	30	-2.10373	-2.04794	-2.04794	-2.35388	-2.44185	-2.43042	-2.51331	-2.53831	-2.34341	-2.65926	-2.64508	-2.64508	-2.73337	-2.74887	-2.65926	-2.60369	-2.57702	-2.6173	-2.60369	-2.45341	-2.53831
406	30	-2.07147	-1.9951	-2.00992	-2.31264	-2.41912	-2.37516	-2.51331	-2.53831	-2.32279	-2.68825	-2.63109	-2.64508	-2.68825	-2.7181	-2.64508	-2.6173	-2.52573	-2.55105	-2.57702	-2.4651	-2.59027
412	30	-2.04794	-1.9951	-1.98777	-2.32279	-2.3969	-2.40795	-2.48891	-2.36446	-2.33304	-2.6173	-2.60369	-2.6173	-2.70306	-2.70306	-2.67365	-2.65926	-2.59027	-2.59027	-2.55105	-2.44185	-2.59027
417	30	-2.01741	-1.93102	-1.9805	-2.32279	-2.38597	-2.37516	-2.50104	-2.36446	-2.32279	-2.60369	-2.6173	-2.63109	-2.68825	-2.68825	-2.64508	-2.59027	-2.53831	-2.56395	-2.56395	-2.48891	-2.53831
423	30	-2.02495	-1.94491	-1.93794	-2.26336	-2.40795	-2.38597	-2.55105	-2.34341	-2.32279	-2.6173	-2.57702	-2.64508	-2.67365	-2.6173	-2.60369	-2.60369	-2.60369	-2.55105	-2.59027	-2.40795	-2.57702
429	30	-1.96611	-1.89712	-1.95193	-2.28278	-2.36446	-2.34341	-2.47694	-2.28278	-2.33304	-2.6173	-2.64508	-2.64508	-2.64508	-2.65926	-2.6173	-2.55105	-2.59027	-2.51331	-2.55105	-2.45341	-2.50104
434	30	-1.959	-1.92415	-1.97328	-2.24432	-2.36446	-2.29263	-2.44185	-2.26336	-2.32279	-2.6173	-2.55105	-2.64508	-2.57702	-2.64508	-2.6173	-2.52573	-2.56395	-2.50104	-2.55105	-2.43042	-2.51331
440	30	-1.97328	-1.8708	-1.93102	-2.25379	-2.34341	-2.30259	-2.37516	-2.24432	-2.30259	-2.6173	-2.56395	-2.60369	-2.65926	-2.63109	-2.63109	-2.52573	-2.50104	-2.45341	-2.50104	-2.43042	-2.50104
445	30	-1.93102	-1.83258	-1.90381	-2.24432	-2.31264	-2.28278	-2.3969	-2.28278	-2.25379	-2.57702	-2.60369	-2.57702	-2.63109	-2.57702	-2.53831	-2.37516	-2.41912	-2.48891	-2.4651	-2.37516	-2.53831
451	30	-1.92415	-1.82016	-1.8708	-2.24432	-2.27303	-2.29263	-2.35388	-2.28278	-2.26336	-2.55105	-2.50104	-2.56395	-2.6173	-2.57702	-2.57702	-2.41912	-2.33304	-2.43042	-2.47694	-2.44185	-2.48891
456	30	-1.89048	-1.82016	-1.8579	-2.23493	-2.28278	-2.29263	-2.26336	-2.23493	-2.27303	-2.56395	-2.52573	-2.57702	-2.59027	-2.60369	-2.52573	-2.43042	-2.37516	-2.48891	-2.48891	-2.43042	-2.43042
462	30	-1.87732	-1.79577	-1.8708	-2.19823	-2.29263	-2.27303	-2.22562	-2.25379	-2.29263	-2.55105	-2.57702	-2.55105	-2.60369	-2.64508	-2.56395	-2.3969	-2.37516	-2.45341	-2.47694	-2.3969	-2.44185
468	30	-1.8708	-1.79577	-1.82635	-2.20727	-2.30259	-2.26336	-2.28278	-2.27303	-2.27303	-2.51331	-2.55105	-2.57702	-2.59027	-2.6173	-2.59027	-2.3969	-2.35388	-2.48891	-2.48891	-2.40795	-2.51331
473	30	-1.85151	-1.77196	-1.81401	-2.19823	-2.28278	-2.28278	-2.23493	-2.28278	-2.25379	-2.56395	-2.53831	-2.53831	-2.57702	-2.60369	-2.59027	-2.36446	-2.37516	-2.45341	-2.48891	-2.43042	-2.47694
479	30	-1.85151	-1.78379	-1.81401	-2.23493	-2.29263	-2.27303	-2.23493	-2.27303	-2.25379	-2.55105	-2.52573	-2.57702	-2.6173	-2.6173	-2.56395	-2.37516	-2.35388	-2.34341	-2.4651	-2.41912	-2.47694
484	30	-1.85151	-1.78976	-1.80789	-2.20727	-2.26336	-2.27303	-2.26336	-2.30259	-2.27303	-2.56395	-2.59027	-2.53831	-2.59027	-2.59027	-2.57702	-2.43042	-2.40795	-2.41912	-2.47694	-2.41912	-2.48891
490	30	-1.85151	-1.78379	-1.78379	-2.19823	-2.32279	-2.32279	-2.25379	-2.32279	-2.29263	-2.60369	-2.59027	-2.60369	-2.67365	-2.65926	-2.60369	-2.41912	-2.43042	-2.43042	-2.55105	-2.44185	-2.53831
495	30	-1.85151	-1.81401	-1.81401	-2.31264	-2.34341	-2.32279	-2.34341	-2.31264	-2.31264	-2.63109	-2.63109	-2.67365	-2.70306	-2.65926	-2.63109	-2.45341	-2.41912	-2.41912	-2.48891	-2.40795	-2.59027
501	30	-1.83885	-1.76026	-1.7487	-2.22562	-2.23493	-2.24432	-2.18926	-2.28278	-2.29263	-2.50104	-2.55105	-2.59027	-2.57702	-2.55105	-2.64508	-2.38597	-2.36446	-2.36446	-2.47694	-2.37516	-2.44185
507	30	-1.81401	-1.7487	-1.76609	-2.18926	-2.23493	-2.23493	-2.26336	-2.25379	-2.26336	-2.52573	-2.57702	-2.56395	-2.64508	-2.57702	-2.57702	-2.38597	-2.36446	-2.40795	-2.48891	-2.36446	-2.51331
512	30	-1.81401	-1.72597	-1.70375	-2.18926	-2.20727	-2.24432	-2.22562	-2.25379	-2.20727	-2.53831	-2.50104	-2.55105	-2.60369	-2.64508	-2.56395	-2.37516	-2.35388	-2.38597	-2.3969	-2.35388	-2.4651
518	30	-1.78379	-1.72597	-1.69282	-2.18926	-2.22562	-2.27303	-2.24432	-2.29263	-2.23493	-2.51331	-2.53831	-2.56395	-2.59027	-2.59027	-2.59027	-2.37516	-2.38597	-2.41912	-2.37516	-2.35388	-2.45341
523	30	-1.78379	-1.6874	-1.67665	-2.16282	-2.18926	-2.21641	-2.22562	-2.28278	-2.23493	-2.50104	-2.50104	-2.55105	-2.56395	-2.53831	-2.57702	-2.35388	-2.34341	-2.36446	-2.30259	-2.36446	-2.3969
529	30	-1.7148	-1.66073	-1.63476	-2.18037	-2.18037	-2.22562	-2.18037	-2.29263	-2.20727	-2.52573	-2.48891	-2.48891	-2.55105	-2.57702	-2.6173	-2.38597	-2.35388	-2.36446	-2.34341	-2.31264	-2.44185
534	30	-1.7487	-1.66073	-1.6399	-2.18926	-2.17156	-2.19823	-2.17156	-2.27303	-2.18926	-2.53831	-2.51331	-2.52573	-2.55105	-2.52573	-2.56395	-2.35388	-2.37516	-2.38597	-2.37516	-2.22562	-2.20727
540	30	-1.70375	-1.63476	-1.6399	-2.13707	-2.11196	-2.18926	-2.18037	-2.23493	-2.19823	-2.50104	-2.47694	-2.48891	-2.59027	-2.52573	-2.63109	-2.34341	-2.37516	-2.38597	-2.36446	-2.18926	-2.14558
546	30	-1.6874	-1.63476	-1.59949	-2.14558	-2.12863	-2.18926	-2.20727	-2.24432	-2.17156	-2.50104	-2.47694	-2.51331	-2.51331	-2.53831	-2.48891	-2.35388	-2.33304	-2.35388	-2.26336	-2.24432	-2.10373
551	30	-1.69827	-1.61445	-1.63476	-2.13707	-2.13707	-2.13707	-2.14558	-2.23493	-2.15417	-2.48891	-2.4651	-2.50104	-2.51331	-2.53831	-2.52573	-2.36446	-2.32279	-2.3969	-2.26336	-2.13707	-2.18037
557	30	-1.65026	-1.60445	-1.57504	-2.13707	-2.08747	-2.15417	-2.15417	-2.21641	-2.17156	-2.45341	-2.44185	-2.48891	-2.53831	-2.4651	-2.52573	-2.26336	-2.34341	-2.35388	-2.04022	-2.05573	-2.18926
562	30	-1.64507	-1.59455	-1.57022	-2.10373	-2.10373	-2.14558	-2.11196	-2.20727	-2.12863	-2.43042	-2.40795	-2.48891	-2.53831	-2.50104	-2.55105	-2.29263	-2.28278	-2.34341	-2.03256	-2.01741	-2.01741
568	30	-1.60445	-1.57988	-1.54646	-2.10373	-2.11196	-2.12863	-2.12863	-2.23493	-2.13707	-2.45341	-2.44185	-2.47694	-2.53831	-2.47694	-2.50104	-2.30259	-2.30259	-2.33304	-2.05573	-1.98777	-1.96611
573	30	-1.60445	-1.57504	-1.53248	-2.07147	-2.06357	-2.10373	-2.11196	-2.18037	-2.12863	-2.40795	-2.40795	-2.48891	-2.53831	-2.47694	-2.43042	-2.24432	-2.30259	-2.33304	-1.95193	-1.90381	-1.86433
579	30	-1.59455	-1.54646	-1.54178	-2.07147	-2.04794	-2.11196	-2.11196	-2.18037	-2.11196	-2.41912	-2.43042	-2.4651	-2.51331	-2.4651	-2.47694	-2.23493	-2.33304	-2.29263	-1.83885	-1.79577	-1.80181
585	30	-1.55117	-1.51413	-1.50959	-2.06357	-2.01741	-2.12026	-2.14558	-2.18037	-2.10373	-2.3969	-2.38597	-2.44185	-2.51331	-2.51331	-2.45341	-2.27303	-2.31264	-2.30259	-1.8579	-1.77786	-1.80181
590	30	-1.59455	-1.5559	-1.50959	-2.07944	-1.9951	-2.12863	-2.11196	-2.18926	-2.10373	-2.43042	-2.4651	-2.4651	-2.50104	-2.51331	-2.57702	-2.26336	-2.26336	-2.30259	-1.78976	-1.81401	-1.80789
596	30	-1.55117	-1.50508	-1.50959	-2.06357	-2.07944	-2.12026	-2.07944	-2.19823	-2.11196	-2.40795	-2.44185	-2.45341	-2.4651	-2.48891	-2.48891	-2.26336	-2.24432	-2.31264	-1.78379	-1.76609	-1.77786
601	30	-1.52786	-1.49165	-1.47841	-2.04794	-1.98777	-2.12863	-2.07944	-2.16282	-2.07147	-2.41912	-2.40795	-2.50104	-2.50104	-2.47694	-2.51331	-2.25379	-2.25379	-2.27303	-1.75446	-1.82016	-1.77786
607	30	-1.48722	-1.45672	-1.43548	-2.04022	-1.97328	-2.10373	-2.07944	-2.15417	-2.07944	-2.36446	-2.43042	-2.41912	-2.52573	-2.50104	-2.51331	-2.23493	-2.29263	-2.31264	-1.66601	-1.76609	-1.70375
612	30	-1.50058	-1.46102	-1.47403	-2.04794	-2.00248	-2.08747	-2.07147	-2.16282	-2.10373	-2.45341	-2.45341	-2.4651	-2.51331	-2.4651	-2.47694	-2.25379	-2.30259	-2.30259	-1.76609	-1.79577	-1.79577
618	30	-1.46968	-1.41882	-1.42712	-2.04794	-2.00248	-2.07944	-2.07944	-2.16282	-2.06357	-2.41912	-2.41912	-2.44185	-2.59027	-2.51331	-2.48891	-2.22562	-2.24432	-2.30259	-1.65026	-1.66601	-1.67131
623	30	-1.46534	-1.41059	-1.39837	-2.02495	-2.00248	-2.06357	-2.02495	-2.13707	-2.06357	-2.3969	-2.40795	-2.35388	-2.48891	-2.4651	-2.4651	-2.19823	-2.22562	-2.26336	-1.80789	-1.81401	-1.77786
629	30	-1.43548	-1.39837	-1.4065	-2.02495	-2.00992	-2.04794	-2.03256	-2.12026	-2.05573	-2.34341	-2.40795	-2.41912	-2.51331	-2.4651	-2.50104	-2.17156	-2.24432	-2.26336	-1.78976	-1.77196	-1.73727
635	30	-1.42296	-1.38629	-1.36649	-2.00992	-1.98777	-2.04794	-2.01741	-2.06357	-2.01741	-2.27303	-2.34341	-2.20727	-2.48891	-2.44185	-2.45341	-2.13707	-2.19823	-2.23493	-1.72037	-1.7487	-1.72597
640	30	-1.37437	-1.31677	-1.26231	-1.98777	-1.97328	-2.03256	-1.959	-2.06357	-2.00248	-2.21641	-2.18037	-2.08747	-2.4651	-2.44185	-2.43042	-2.15417	-2.18926	-2.19823	-1.7487	-1.72037	-1.7148
646	30	-1.29098	-1.32803	-1.24827	-2.00248	-1.96611	-2.02495	-1.97328	-2.09557	-1.9951	-2.20727	-2.12026	-2.07147	-2.50104	-2.47694	-2.45341	-2.14558	-2.18926	-2.19823	-1.67131	-1.67131	-1.67131
651	30	-1.33941	-1.19402	-1.15836	-1.96611	-1.95193	-2.00992	-1.95193	-2.04794	-1.9951	-2.20727	-1.9951	-2.06357	-2.47694	-2.40795	-2.47694	-2.12863	-2.14558	-2.18926	-1.66601	-1.6399	-1.65026
657	30	-1.23787	-1.17441	-1.17766	-1.959	-1.92415	-1.97328	-1.93794	-2.04022	-1.96611	-2.16282	-1.9805	-2.04022	-2.50104	-2.41912	-2.38597	-2.07147	-2.12026	-2.17156	-1.69282	-1.67131	-1.65026
662	30	-1.19402	-1.05843	-1.10866	-1.93794	-1.94491	-1.9805	-1.91732	-2.03256	-1.93102	-2.05573	-2.06357	-1.9805	-2.40795	-2.43042	-2.36446	-2.07944	-2.10373	-2.15417	-1.65026	-1.61949	-1.59949
668	30	-1.07587	-1.1457	-1.02722	-1.91732	-1.90381	-1.959	-1.93102	-1.9951	-1.93102	-1.88387	-2.12026	-1.93102	-2.45341	-2.3969	-2.40795	-2.25379	-2.05573	-2.10373	-1.62455	-1.60445	-1.60445
674	30	-1.04412	-1.00239	-1.06421	-1.91054	-1.89712	-1.94491	-1.88387	-1.93102	-1.89712	-1.79577	-1.91054	-1.93794	-2.43042	-2.40795	-2.34341	-2.20727	-2.05573	-2.10373	-1.65548	-1.67665	-1.65026
679	30	-1.07881	-1.07294	-0.994252	-1.92415	-1.88387	-1.92415	-1.8708	-1.97328	-1.88387	-1.74297	-1.82016	-1.65548	-2.41912	-2.35388	-2.36446	-2.28278	-2.04794	-2.07147	-1.60944	-1.61949	-1.58475
685	30	-0.964956	-1.0106	-0.896488	-1.91732	-1.89048	-1.93102	-1.8579	-1.97328	-1.8708	-1.62455	-1.76026	-1.69282	-2.38597	-2.38597	-2.32279	-2.03256	-2.09557	-2.03256	-1.6399	-1.62455	-1.64507
690	30	-0.858022	-0.858022	-0.834711	-1.89712	-1.89048	-1.93794	-1.82016	-1.91732	-1.85151	-1.60445	-1.60944	-1.56065	-2.40795	-2.36446	-2.34341	-1.89712	-2.08747	-2.02495	-1.6399	-1.62455	-1.58964
696	30	-0.809681	-0.916291	-0.774357	-1.89048	-1.8708	-1.92415	-1.80181	-1.94491	-1.84516	-1.42296	-1.57988	-1.46534	-2.3969	-2.37516	-2.35388	-2.09557	-1.91732	-1.98777	-1.58475	-1.57988	-1.57988
701	30	-0.759287	-0.896488	-0.759287	-1.8579	-1.83258	-1.89048	-1.76609	-1.90381	-1.79577	-1.41059	-1.50959	-1.50959	-2.37516	-2.35388	-2.30259	-1.84516	-1.89712	-1.93794	-1.61445	-1.57022	-1.55117
707	30	-0.685179	-0.70522	-0.778705	-1.8579	-1.78976	-1.85151	-1.73161	-1.86433	-1.76609	-1.40242	-1.36649	-1.46534	-2.35388	-2.32279	-2.31264	-1.79577	-1.9805	-1.91054	-1.57022	-1.56065	-1.53248
713	30	-0.655851	-0.659712	-0.727739	-1.83258	-1.81401	-1.90381	-1.6874	-1.83885	-1.72037	-1.28374	-1.42296	-1.52326	-2.33304	-2.30259	-2.28278	-1.87732	-1.90381	-1.86433	-1.59455	-1.57022	-1.58964
718	30	-0.671386	-0.652005	-0.671386	-1.79577	-1.77786	-1.83258	-1.66601	-1.77786	-1.69827	-1.23443	-1.35868	-1.3548	-2.32279	-2.25379	-2.29263	-1.89048	-1.79577	-1.8579	-1.57022	-1.5559	-1.53712
724	30	-0.581606	-0.675307	-0.677274	-1.79577	-1.77196	-1.85151	-1.63476	-1.77786	-1.65026	-1.30195	-1.3823	-1.4397	-2.32279	-2.30259	-2.26336	-1.77786	-1.76026	-1.86433	-1.5559	-1.54178	-1.51868
729	30	-0.555126	-0.606969	-0.634878	-1.80181	-1.74297	-1.83885	-1.62455	-1.73161	-1.58964	-1.10866	-1.28013	-1.42296	-2.33304	-2.27303	-2.31264	-1.76026	-1.80789	-1.79577	-1.52326	-1.50058	-1.48281
735	30	-0.510826	-0.504181	-0.646264	-1.77196	-1.73727	-1.82016	-1.61445	-1.7148	-1.54178	-1.08176	-1.29828	-1.53712	-2.29263	-2.27303	-2.28278	-1.60445	-1.89712	-1.80789	-1.53248	-1.50058	-1.48281
740	30	-0.536143	-0.443167	-0.543005	-1.77786	-1.74297	-1.80181	-1.59455	-1.66073	-1.57988	-1.20731	-1.28735	-1.3356	-2.31264	-2.24432	-2.20727	-1.51868	-1.93102	-1.80181	-1.51413	-1.50508	-1.46534
746	30	-0.391562	-0.352398	-0.470004	-1.76026	-1.70375	-1.78976	-1.5559	-1.63476	-1.54646	-1.19733	-1.28735	-1.4397	-2.27303	-2.23493	-2.21641	-1.51868	-1.73161	-1.68201	-1.45243	-1.4397	-1.41059
752	30	-0.417032	-0.243346	-0.48776	-1.7487	-1.72037	-1.77196	-1.53248	-1.60445	-1.57988	-1.2174	-1.31304	-1.30933	-2.26336	-2.21641	-2.16282	-1.61445	-1.64507	-1.70375	-1.54646	-1.49165	-1.46534
757	30	-0.38126	-0.332679	-0.39601	-1.73161	-1.74297	-1.76609	-1.50959	-1.57022	-1.5559	-1.15201	-1.26585	-1.34707	-2.24432	-2.17156	-2.18926	-1.64507	-1.61949	-1.70926	-1.51413	-1.48281	-1.46534
763	30	-0.406466	-0.316082	-0.378336	-1.68201	-1.7148	-1.70375	-1.52326	-1.5559	-1.54646	-1.1178	-1.19402	-1.41059	-2.24432	-2.14558	-2.15417	-1.51868	-1.56065	-1.60445	-1.46102	-1.46102	-1.4397
768	30	-0.363843	-0.486133	-0.379797	-1.72597	-1.7487	-1.73727	-1.48281	-1.55117	-1.52786	-1.12086	-1.28374	-1.3356	-2.20727	-2.13707	-2.13707	-1.64507	-1.53248	-1.59949	-1.49165	-1.47841	-1.48722
774	30	-0.352398	-0.355247	-0.372514	-1.70375	-1.73727	-1.75446	-1.43129	-1.5559	-1.44392	-1.10564	-1.26585	-1.28013	-2.19823	-2.13707	-2.16282	-1.6399	-1.49611	-1.57504	-1.48722	-1.46968	-1.44817
779	30	-0.400478	-0.251029	-0.299755	-1.70375	-1.69282	-1.74297	-1.42712	-1.51868	-1.42296	-1.07294	-1.26231	-1.29098	-2.20727	-2.12863	-2.18037	-1.56065	-1.46968	-1.54178	-1.49611	-1.47403	-1.46968
785	30	-0.249744	-0.385662	-0.338274	-1.68201	-1.68201	-1.70926	-1.41882	-1.48722	-1.39433	-1.09362	-1.26231	-1.3548	-2.19823	-2.14558	-2.12863	-1.54646	-1.40242	-1.50508	-1.47403	-1.46534	-1.44817
790	30	-0.204567	-0.262664	-0.388608	-1.66073	-1.6399	-1.67131	-1.39837	-1.45672	-1.35868	-1.05555	-1.15201	-1.2694	-2.13707	-2.12026	-2.12026	-1.42296	-1.39433	-1.57022	-1.45243	-1.41469	-1.39837
796	30	-0.215672	-0.163696	-0.253603	-1.67131	-1.65026	-1.69827	-1.37833	-1.44392	-1.35868	-1.03564	-1.23443	-1.27654	-2.16282	-2.11196	-2.07944	-1.46968	-1.4065	-1.44392	-1.47403	-1.45243	-1.44817
802	30	-0.225647	-0.12443	-0.238257	-1.65026	-1.52326	-1.69282	-1.34707	-1.38629	-1.31304	-1.02722	-1.22758	-1.27654	-2.12863	-2.09557	-2.12026	-1.38629	-1.3903	-1.43548	-1.46102	-1.4397	-1.41469
807	30	-0.34249	-0.298406	-0.306525	-1.60944	-1.4397	-1.63476	-1.34707	-1.40242	-1.24827	-1.03846	-1.20397	-1.20731	-2.11196	-2.07147	-2.08747	-1.35868	-1.36258	-1.39837	-1.4397	-1.3903	-1.41469
813	30	-0.185125	-0.117658	-0.236989	-1.63476	-1.52326	-1.50959	-1.34323	-1.35868	-1.25176	-0.980829	-1.20065	-1.29098	-2.06357	-2.06357	-2.08747	-1.27654	-1.54646	-1.5559	-1.4397	-1.40242	-1.40242
818	30	-0.298406	-0.0565704	-0.149661	-1.49611	-1.46534	-1.59949	-1.30933	-1.34323	-1.17441	-0.97551	-1.1301	-1.28013	-2.02495	-2.01741	-2.06357	-1.10564	-1.42712	-1.35093	-1.41469	-1.3823	-1.37437
824	30	-0.118784	-0.0725707	-0.289016	-1.58964	-1.46968	-1.50959	-1.29463	-1.30195	-1.16475	-0.980829	-1.16155	-1.21402	-2.00248	-2.00992	-2.01741	-1.18744	-1.46102	-1.43548	-1.4397	-1.42296	-1.41059
829	30	-0.12897	-0.0790432	-0.214432	-1.54178	-1.40242	-1.58964	-1.24479	-1.2694	-1.13943	-0.980829	-1.18744	-1.2694	-1.96611	-1.98777	-1.9951	-1.20731	-1.43548	-1.36649	-1.41882	-1.38629	-1.36649
835	30	-0.0822952	-0.0844692	-0.110932	-1.42712	-1.4065	-1.50058	-1.16475	-1.22758	-1.08471	-0.986177	-1.1332	-1.29463	-1.89048	-1.94491	-1.95193	-1.09961	-1.32051	-1.43129	-1.3903	-1.40242	-1.35093
841	30	-0.123298	-0.0576291	-0.134675	-1.51413	-1.30195	-1.51868	-1.1332	-1.20065	-0.991553	-0.933946	-1.1301	-1.26231	-1.81401	-1.94491	-1.93102	-1.1332	-1.30933	-1.41469	-1.36649	-1.33181	-1.32051
846	30	-0.0171462	-0.0397809	-0.266573	-1.54178	-1.36258	-1.41882	-1.12393	-1.22078	-0.972861	-0.936493	-1.10564	-1.14885	-1.84516	-1.92415	-1.90381	-1.09661	-1.29828	-1.43548	-1.41882	-1.31677	-1.29463
852	30	-0.116534	0.00895974	-0.122168	-1.50058	-1.36649	-1.45243	-1.07587	-1.18417	-0.964956	-0.936493	-1.11474	-1.2174	-1.82635	-1.91732	-1.90381	-1.04982	-1.25878	-1.25878	-1.43129	-1.36258	-1.36649
857	30	-0.0377019	-0.00400802	-0.136966	-1.48281	-1.32803	-1.48281	-1.06132	-1.16155	-0.939048	-0.92887	-1.13943	-1.28735	-1.83885	-1.87732	-1.8708	-0.980829	-1.2694	-1.22078	-1.3903	-1.36258	-1.35868
863	30	-0.0481404	-0.0932124	-0.149661	-1.32051	-1.26231	-1.29463	-1.00786	-1.10564	-0.89404	-0.911303	-1.12086	-1.21402	-1.75446	-1.82635	-1.78976	-0.903868	-1.1178	-1.27297	-1.3548	-1.32051	-1.27297
868	30	0.0178399	-0.0640053	-0.105361	-1.30195	-1.29098	-1.39837	-0.944176	-1.09064	-0.834711	-0.891598	-1.09961	-1.28374	-1.6399	-1.7148	-1.72037	-0.898942	-1.0106	-1.24133	-1.31304	-1.30195	-1.30564
874	30	-0.0151136	-0.0314907	-0.0232686	-1.40242	-1.25878	-1.28374	-0.936493	-1.04982	-0.809681	-0.889162	-1.10866	-1.20731	-1.70926	-1.73727	-1.68201	-0.881889	-1.00239	-1.19402	-1.3356	-1.30564	-1.32426
880	30	-0.0151136	-0.0954102	0.00796817	-1.35868	-1.21066	-1.28735	-0.881889	-1.01611	-0.757153	-0.879477	-1.06711	-1.22758	-1.62964	-1.69282	-1.59455	-0.827822	-0.996959	-1.24479	-1.30195	-1.26585	-1.29098
885	30	0.0411419	0.0430595	0.0217615	-1.37437	-1.24133	-1.28374	-0.81871	-0.95972	-0.74866	-0.860383	-1.03282	-1.19402	-1.64507	-1.61445	-1.56065	-0.805197	-1.07881	-1.28013	-1.32426	-1.29463	-1.29098
891	30	-0.0171462	0.0392207	-0.0130852	-1.30933	-1.22078	-1.29098	-0.761426	-0.944176	-0.699165	-0.850971	-1.03846	-1.14885	-1.6399	-1.64507	-1.56065	-0.746548	-1.07881	-1.07881	-1.35868	-1.31304	-1.32051
896	30	-0.0439519	-0.0222456	-0.0481404	-1.28735	-1.18417	-1.24133	-0.70522	-0.908819	-0.679244	-0.865122	-1.06711	-1.07881	-1.56542	-1.60944	-1.49165	-0.77219	-0.999672	-0.999672	-1.37042	-1.29098	-1.28013
902	30	-0.0294288	0.105261	0.0353671	-1.23787	-1.19402	-1.25878	-0.677274	-0.865122	-0.661649	-0.84397	-1.00239	-1.12701	-1.59949	-1.57504	-1.46102	-0.76357	-1.03564	-1.01888	-1.31677	-1.26585	-1.28013
907	30	0.0676586	0.0685928	-0.00501254	-1.18744	-1.15836	-1.23787	-0.629234	-0.86275	-0.619897	-0.860383	-1.07002	-1.11474	-1.59455	-1.54178	-1.46534	-0.738145	-0.951918	-1.02722	-1.34323	-1.28735	-1.32051
913	30	0.0880109	0.0676586	0	-1.12393	-1.07881	-1.21066	-0.60148	-0.881889	-0.590591	-0.855666	-1.04982	-1.21066	-1.51868	-1.43129	-1.35868	-0.738145	-0.913794	-1.07881	-1.24133	-1.23443	-1.19733
919	30	-0.00803217	0.0685928	-0.0253178	-1.18744	-1.10866	-1.16155	-0.603306	-0.805197	-0.551648	-0.850971	-0.996959	-1.03282	-1.47841	-1.42296	-1.24827	-0.721547	-0.869884	-1.10564	-1.30933	-1.23443	-1.21402
924	30	-0.018164	0.0421012	-0.036664	-1.25878	-1.05555	-1.18091	-0.563875	-0.746548	-0.525939	-0.811931	-0.972861	-1.18091	-1.38629	-1.30933	-1.1301	-0.707246	-0.723606	-1.07881	-1.20065	-1.17441	-1.17118
930	30	-0.0523465	-0.0202027	0.0314987	-1.16796	-1.07002	-1.12701	-0.515838	-0.659712	-0.49758	-0.807436	-1.02443	-1.13631	-1.3548	-1.20397	-0.991553	-0.665532	-0.701179	-0.994252	-1.21402	-1.14256	-1.12393
935	30	-0.026344	0.0907544	0.0276152	-1.12393	-1.09961	-1.10564	-0.517515	-0.65778	-0.471605	-0.802962	-0.944176	-1.05268	-1.19733	-1.19733	-0.983499	-0.653926	-0.699165	-1.03282	-1.24133	-1.20731	-1.2174
941	30	0.0554347	0.113329	-0.0283995	-1.09961	-1.02722	-1.12393	-0.546453	-0.578034	-0.450986	-0.767871	-0.933946	-1.09661	-1.1457	-1.10866	-0.941609	-0.640555	-0.679244	-0.983499	-1.25527	-1.20731	-1.17118
946	30	0.0834216	0.0573251	-0.040822	-1.08767	-1.03564	-1.07294	-0.458866	-0.53273	-0.438505	-0.765718	-0.936493	-1.08767	-1.08176	-1.02443	-0.913794	-0.597837	-0.606969	-0.944176	-1.2174	-1.15518	-1.13631
952	30	0.0344014	0.105261	0.0459289	-1.05555	-1.02443	-1.06132	-0.457285	-0.465215	-0.394525	-0.767871	-0.954512	-0.986177	-1.08471	-0.962335	-0.834711	-0.614336	-0.648174	-0.921303	-1.28374	-1.2174	-1.21066
957	30	0.0806579	0.0861777	-0.0449974	-1.04412	-1.00512	-1.04982	-0.39601	-0.438505	-0.390084	-0.746548	-0.923819	-1.05843	-0.97551	-0.86275	-0.774357	-0.576253	-0.581606	-0.881889	-1.22418	-1.17766	-1.20731
963	30	0.0601539	0.135405	-0.105361	-1.03564	-0.994252	-1.1178	-0.41855	-0.41098	-0.362406	-0.736055	-1.00239	-1.16155	-0.872274	-0.872274	-0.72567	-0.567396	-0.594207	-0.916291	-1.1457	-1.11474	-1.10866
969	30	0.07139	0.0889262	-0.0534008	-0.983499	-0.986177	-1.01888	-0.393043	-0.390084	-0.365283	-0.759287	-0.980829	-1.05555	-0.916291	-0.572701	-0.640555	-0.578034	-0.588787	-0.83933	-1.22418	-1.15836	-1.15201
974	30	0.0592119	0.108854	0.0158733	-0.964956	-0.978166	-1.03002	-0.356675	-0.356675	-0.353822	-0.723606	-0.879477	-1.07002	-0.84397	-0.436956	-0.583396	-0.55687	-0.548181	-0.848632	-1.14885	-1.12393	-1.1117
980	30	0.0573251	0.103459	0.0344014	-0.916291	-0.918794	-0.999672	-0.36097	-0.388608	-0.349557	-0.752897	-0.941609	-0.999672	-0.794073	-0.376878	-0.484508	-0.562119	-0.551648	-0.83933	-1.19073	-1.1332	-1.11474
985	30	0.0704585	0.0344014	0.0497421	-0.936493	-0.92887	-1.02165	-0.38126	-0.328504	-0.335473	-0.72567	-0.879477	-1.05268	-0.74866	-0.316082	-0.404965	-0.560366	-0.553385	-0.807436	-1.20731	-1.1457	-1.1301
991	30	0.0980337	0.0925792	-0.00601807	-0.87707	-0.889162	-0.95972	-0.316082	-0.34249	-0.324346	-0.729811	-0.908819	-0.94675	-0.752897	-0.236989	-0.313342	-0.536143	-0.565634	-0.798508	-1.20731	-1.12701	-1.1457
996	30	0.0363319	0.0889262	0.0324672	-0.884308	-0.921303	-1.00512	-0.311975	-0.298406	-0.327116	-0.697155	-0.889162	-1.08176	-0.555126	-0.188742	-0.328504	-0.524249	-0.519194	-0.84397	-1.14885	-1.1178	-1.08471
1002	30	0.0449734	0.115113	0.0449734	-0.916291	-0.926341	-0.983499	-0.282363	-0.290352	-0.316082	-0.703198	-0.89404	-1.02722	-0.505838	-0.188742	-0.0725707	-0.527633	-0.507498	-0.77219	-1.17766	-1.12393	-1.1178
1008	30	0.103459	0.0778865	-0.0212236	-0.848632	-0.879477	-0.936493	-0.243346	-0.295714	-0.306525	-0.72567	-0.918794	-1.00239	-0.321584	-0.13582	-0.0397809	-0.525939	-0.525939	-0.742337	-1.15518	-1.1117	-1.10262
1013	30	0.118672	0.0363319	0.0497421	-0.891598	-0.903868	-0.983499	-0.256183	-0.254892	-0.295714	-0.689155	-0.853316	-0.991553	-0.327116	-0.018164	-0.0202027	-0.500875	-0.510826	-0.787458	-1.1301	-1.10262	-1.09961
1019	30	0.0834216	0.133656	0.00796817	-0.858022	-0.855666	-0.916291	-0.275754	-0.267879	-0.294371	-0.70522	-0.86275	-0.983499	-0.285019	0.0834216	-0.0242927	-0.520876	-0.515838	-0.770028	-1.14885	-1.10262	-1.1301
1024	30	0.0592119	0.112435	0.0788112	-0.855666	-0.87707	-0.964956	-0.230672	-0.290352	-0.29169	-0.685179	-0.949331	-1.1301	-0.211956	0.00697561	-0.0910194	-0.500875	-0.522561	-0.767871	-1.12086	-1.03002	-1.03564
1030	30	-0.0120726	0.160417	0.0592119	-0.809681	-0.81871	-0.931404	-0.224394	-0.236989	-0.265268	-0.655851	-0.841647	-1.01611	-0.149661	0.0430595	0.0667236	-0.494296	-0.519194	-0.755023	-1.09661	-1.04412	-1.03846
1035	30	0.0188218	0.0834216	-0.0130852	-0.794073	-0.805197	-0.879477	-0.207024	-0.229413	-0.260067	-0.661649	-0.858022	-0.954512	-0.0449974	0.128393	0.103459	-0.481267	-0.534435	-0.740239	-1.13943	-1.10262	-1.10262
1041	30	0.129272	0.0925792	-0.002002	-0.767871	-0.789658	-0.889162	-0.211956	-0.197232	-0.251029	-0.644357	-0.816445	-1.00786	-0.080126	0.115113	0.111541	-0.452557	-0.48776	-0.709277	-1.06421	-1.03282	-1.01335
1047	30	0.131905	0.123986	-0.0544562	-0.740239	-0.765718	-0.846298	-0.229413	-0.223144	-0.238257	-0.665532	-0.846298	-0.936493	-0.0140989	0.133656	0.143234	-0.455706	-0.484508	-0.695149	-1.14885	-1.09362	-1.08767
1052	30	0.150143	0.123986	-0.018164	-0.72567	-0.757153	-0.853316	-0.224394	-0.230672	-0.234457	-0.61804	-0.770028	-0.986177	0.0980337	0.156149	0.149282	-0.458866	-0.458866	-0.723606	-1.07881	-1.01888	-1.03564
1058	30	0.0344014	0.130151	0.0778865	-0.738145	-0.757153	-0.865122	-0.214432	-0.175545	-0.218156	-0.621757	-0.776529	-0.916291	0.161268	0.203757	0.120446	-0.432323	-0.446287	-0.673345	-1.1117	-1.04982	-1.07002
1063	30	0.0610951	0.0620354	0.08158	-0.701179	-0.71744	-0.789658	-0.194799	-0.200893	-0.219401	-0.644357	-0.814186	-0.879477	0.1415	0.165514	0.202124	-0.433865	-0.45413	-0.659712	-1.1301	-1.07002	-1.06132
1069	30	0.00299551	0.0953102	0.0601539	-0.707246	-0.767871	-0.879477	-0.200893	-0.219401	-0.211956	-0.623621	-0.783072	-0.97551	0.133656	0.19967	0.206201	-0.463624	-0.465215	-0.701179	-1.07002	-1.01888	-1.05268
1074	30	0.0158733	0.123102	-0.0171462	-0.677274	-0.72567	-0.84397	-0.176737	-0.174353	-0.198451	-0.627359	-0.814186	-0.918794	0.162119	0.21188	0.207827	-0.433865	-0.463624	-0.659712	-1.12701	-1.06421	-1.07294
1080	30	-0.0110609	0.0421012	0.0363319	-0.689155	-0.74444	-0.827822	-0.171975	-0.185125	-0.203341	-0.606969	-0.827822	-0.999672	0.152721	0.225541	0.198851	-0.444726	-0.444726	-0.652005	-1.03564	-0.962335	-0.970219
1085	30	0.08158	0.105261	0.0843411	-0.695149	-0.738145	-0.780886	-0.211956	-0.219401	-0.219401	-0.614336	-0.733969	-0.939048	0.173113	0.245296	0.249201	-0.463624	-0.432323	-0.650088	-1.10866	-1.05555	-1.06132
1091	30	0.124869	0.0880109	0.0741794	-0.685179	-0.72567	-0.791863	-0.215672	-0.197232	-0.219401	-0.599657	-0.77219	-0.986177	0.20945	0.24373	0.248421	-0.446287	-0.435409	-0.693147	-1.01888	-0.970219	-0.967584
1097	30	0.103459	0.103459	0.0109399	-0.671386	-0.703198	-0.750776	-0.230672	-0.221894	-0.192372	-0.60148	-0.733969	-0.918794	0.244514	0.274597	0.278389	-0.440057	-0.414001	-0.665532	-1.07002	-1.02165	-1.01335
1102	30	0.0158733	0.175633	0.0525924	-0.644357	-0.70522	-0.72567	-0.197232	-0.181522	-0.176737	-0.60148	-0.774357	-0.858022	0.20945	0.24686	0.283674	-0.429246	-0.379797	-0.586987	-1.06711	-0.991553	-0.980829
1108	30	0.108854	0.0834216	0.0129162	-0.646264	-0.703198	-0.74866	-0.163696	-0.210721	-0.171975	-0.603306	-0.759287	-0.90634	0.241376	0.24998	0.279146	-0.435409	-0.415515	-0.616186	-1.02443	-0.983499	-0.986177
1113	30	0.0411419	0.0449734	0.00299551	-0.634878	-0.659712	-0.72567	-0.214432	-0.209487	-0.176737	-0.603306	-0.77219	-0.846298	0.176471	0.24998	0.266203	-0.41855	-0.41249	-0.621757	-1.06711	-1.01888	-1.05268
1119	30	0.14583	0.126633	0.0487902	-0.610646	-0.636767	-0.71744	-0.179127	-0.198451	-0.180324	-0.560366	-0.719491	-0.898942	0.223943	0.268499	0.281412	-0.407968	-0.393043	-0.644357	-1.00512	-0.931404	-0.933946
1124	30	0.0732505	0.181488	0.00895974	-0.603306	-0.619897	-0.677274	-0.208255	-0.171975	-0.189951	-0.578034	-0.727739	-0.83933	0.266969	0.284427	0.304539	-0.397497	-0.409473	-0.619897	-1.02722	-0.951918	-0.964956
1130	30	0.0861777	0.136278	0.0870947	-0.599657	-0.603306	-0.711311	-0.183923	-0.203341	-0.194799	-0.546453	-0.659712	-0.89404	0.215111	0.274597	0.287432	-0.426178	-0.420071	-0.638659	-1.02722	-0.970219	-0.967584
1136	30	0.00895974	0.111541	0.0148886	-0.612489	-0.610646	-0.70522	-0.187535	-0.226901	-0.199671	-0.579818	-0.731888	-0.809681	0.212689	0.256191	0.263902	-0.403467	-0.369615	-0.629234	-1.00239	-0.949331	-0.957113
1141	30	0.115113	0.108854	-0.018164	-0.590591	-0.614336	-0.71744	-0.193585	-0.208255	-0.193585	-0.551648	-0.72567	-0.87707	0.253091	0.269263	0.19062	-0.403467	-0.409473	-0.663588	-0.951918	-0.908819	-0.923819
1147	30	0.0778865	0.1441	-0.0171462	-0.592397	-0.642454	-0.695149	-0.189951	-0.200893	-0.204567	-0.579818	-0.736055	-0.816445	0.259283	0.287432	0.231112	-0.401971	-0.394525	-0.594207	-1.03282	-0.957113	-0.95972
1152	30	0.0421012	0.117783	0.0544882	-0.612489	-0.632993	-0.731888	-0.238257	-0.221894	-0.202116	-0.560366	-0.727739	-0.916291	0.285931	0.266969	0.211071	-0.409473	-0.430783	-0.667479	-0.95972	-0.921303	-0.913794
1158	30	0.0916672	0.107059	-0.0212236	-0.632993	-0.621757	-0.750776	-0.270497	-0.180324	-0.211956	-0.558616	-0.729811	-0.913794	0.282167	0.268499	0.249201	-0.409473	-0.417032	-0.631112	-0.994252	-0.94675	-0.923819
1163	30	0.118672	0.0601539	-0.0888312	-0.58519	-0.59602	-0.667479	-0.192372	-0.173164	-0.193585	-0.553385	-0.709277	-0.809681	0.29267	0.272315	0.260054	-0.397497	-0.39601	-0.614336	-1.00786	-0.941609	-0.962335
1169	30	0.103459	0.129272	0.0459289	-0.579818	-0.605136	-0.667479	-0.181522	-0.167236	-0.199671	-0.581606	-0.695149	-0.846298	0.303801	0.236652	0.254642	-0.409473	-0.36097	-0.627359	-0.94675	-0.898942	-0.889162
1175	30	0.0788112	0.160417	-0.0010005	-0.569161	-0.594207	-0.671386	-0.175545	-0.176737	-0.197232	-0.569161	-0.701179	-0.816445	0.298622	0.254642	0.279146	-0.41098	-0.41249	-0.606969	-1.02165	-0.95972	-0.95972
1180	30	0.153579	0.116004	0.0478373	-0.558616	-0.60148	-0.629234	-0.181522	-0.18633	-0.202116	-0.558616	-0.707246	-0.780886	0.269263	0.268499	0.24373	-0.41855	-0.41249	-0.594207	-0.972861	-0.896488	-0.916291
1186	30	0.131905	0.168899	0.105261	-0.548181	-0.581606	-0.632993	-0.200893	-0.155485	-0.204567	-0.53273	-0.65778	-0.830113	0.254642	0.246079	0.256191	-0.400478	-0.387134	-0.650088	-0.916291	-0.874669	-0.884308
1191	30	0.103459	0.163818	0.0158733	-0.55687	-0.60148	-0.689155	-0.183923	-0.204567	-0.185125	-0.514165	-0.683197	-0.931404	0.253091	0.259283	0.237441	-0.388608	-0.433865	-0.650088	-0.941609	-0.913794	-0.931404
1197	30	0.0119286	0.114221	0.0573251	-0.549913	-0.578034	-0.621757	-0.205795	-0.180324	-0.192372	-0.525939	-0.693147	-0.770028	0.265436	0.250759	0.269263	-0.38126	-0.373966	-0.583396	-0.95972	-0.867501	-0.867501
1202	30	0.166362	0.189794	0.0620354	-0.549913	-0.59602	-0.669431	-0.224394	-0.192372	-0.191161	-0.548181	-0.667479	-0.858022	0.231905	0.24373	0.232698	-0.391562	-0.404965	-0.648174	-0.923819	-0.860383	-0.891598
1208	30	0.143234	0.173953	0.0573251	-0.536143	-0.579818	-0.614336	-0.205795	-0.196015	-0.205795	-0.558616	-0.632993	-0.767871	0.237441	0.290428	0.256191	-0.385662	-0.365283	-0.608806	-0.951918	-0.898942	-0.926341
1214	30	0.10616	0.0506931	0.0158733	-0.553385	-0.565634	-0.653926	-0.202116	-0.164875	-0.192372	-0.510826	-0.669431	-0.848632	0.227932	0.250759	0.228728	-0.391562	-0.39601	-0.663588	-0.918794	-0.865122	-0.884308
1219	30	0.0870947	0.0861777	0.10616	-0.543005	-0.567396	-0.638659	-0.162519	-0.18633	-0.173164	-0.527633	-0.652005	-0.746548	0.234281	0.257738	0.274597	-0.391562	-0.404965	-0.623621	-0.988861	-0.884308	-0.896488
1225	30	0.0925792	0.119559	0.117783	-0.560366	-0.565634	-0.616186	-0.171975	-0.166055	-0.194799	-0.537854	-0.661649	-0.776529	0.253091	0.244514	0.216723	-0.390084	-0.41249	-0.640555	-0.941609	-0.860383	-0.889162
1230	30	0.0353671	0.117783	-0.026344	-0.565634	-0.614336	-0.70522	-0.204567	-0.154317	-0.202116	-0.522561	-0.677274	-0.879477	0.229523	0.242946	0.23349	-0.384193	-0.443167	-0.681219	-0.881889	-0.823256	-0.848632
1236	30	0.13715	0.124869	0.0685928	-0.529329	-0.567396	-0.627359	-0.193585	-0.179127	-0.193585	-0.53273	-0.623621	-0.798508	0.236652	0.256191	0.241376	-0.406466	-0.404965	-0.667479	-0.933946	-0.884308	-0.874669
1241	30	0.0998453	0.0944007	0.08158	-0.544727	-0.581606	-0.61804	-0.175545	-0.213193	-0.218156	-0.546453	-0.61804	-0.770028	0.235072	0.258511	0.235072	-0.41098	-0.391562	-0.648174	-0.95972	-0.896488	-0.903868
1247	30	0.10436	0.0741794	0.0314987	-0.544727	-0.586987	-0.693147	-0.228156	-0.176737	-0.191161	-0.48776	-0.648174	-0.848632	0.253867	0.262364	0.276115	-0.406466	-0.427711	-0.681219	-0.896488	-0.855666	-0.874669
1252	30	0.0639133	0.157858	0.0363319	-0.549913	-0.578034	-0.665532	-0.208255	-0.187535	-0.197232	-0.519194	-0.646264	-0.798508	0.234281	0.253091	0.244514	-0.415515	-0.404965	-0.681219	-0.92887	-0.879477	-0.881889
1258	30	0.0610951	0.00895974	-0.0120726	-0.578034	-0.590591	-0.653926	-0.176737	-0.162519	-0.187535	-0.502527	-0.671386	-0.825536	0.253091	0.276115	0.267734	-0.397497	-0.404965	-0.671386	-0.891598	-0.84397	-0.848632
1264	30	0.0334348	0.122218	0.0685928	-0.560366	-0.58519	-0.71335	-0.251029	-0.220647	-0.18633	-0.478036	-0.689155	-0.869884	0.236652	0.23349	0.258511	-0.391562	-0.452557	-0.671386	-0.884308	-0.834711	-0.83933
1269	30	0.0870947	0.166362	0.0962189	-0.541285	-0.569161	-0.616186	-0.249744	-0.199671	-0.204567	-0.494296	-0.655851	-0.791863	0.24998	0.253091	0.251537	-0.403467	-0.426178	-0.677274	-0.90634	-0.872274	-0.855666
1275	30	0.160417	0.171429	0.133656	-0.572701	-0.58519	-0.671386	-0.245901	-0.193585	-0.210721	-0.492658	-0.677274	-0.841647	0.282921	0.263133	0.256965	-0.404965	-0.435409	-0.685179	-0.908819	-0.841647	-0.853316
1280	30	0.146694	0.154436	0.0449734	-0.549913	-0.578034	-0.679244	-0.242072	-0.163696	-0.197232	-0.463624	-0.636767	-0.841647	0.256965	0.267734	0.257738	-0.41249	-0.41249	-0.729811	-0.884308	-0.834711	-0.81871
1286	30	0.105261	0.0998453	0.0468836	-0.560366	-0.581606	-0.701179	-0.194799	-0.193585	-0.194799	-0.441611	-0.636767	-0.860383	0.222343	0.270027	0.269263	-0.406466	-0.435409	-0.695149	-0.944176	-0.83933	-0.846298
1291	30	0.0806579	0.079735	0.0657877	-0.537854	-0.565634	-0.653926	-0.167236	-0.179127	-0.175545	-0.473209	-0.663588	-0.731888	0.300845	0.277632	0.266969	-0.394525	-0.438505	-0.648174	-0.951918	-0.889162	-0.858022
1297	30	0.173113	0.131905	0.131028	-0.551648	-0.57093	-0.638659	-0.189951	-0.169603	-0.193585	-0.502527	-0.691149	-0.780886	0.249201	0.260825	0.276115	-0.429246	-0.447851	-0.663588	-0.89404	-0.853316	-0.872274
1303	30	0.0723207	0.198031	0.0907544	-0.546453	-0.578034	-0.671386	-0.203341	-0.167236	-0.185125	-0.450986	-0.629234	-0.81871	0.236652	0.288931	0.258511	-0.393043	-0.441611	-0.697155	-0.89404	-0.827822	-0.84397
1308	30	0.131905	0.116004	0.0861777	-0.531028	-0.563875	-0.634878	-0.182722	-0.174353	-0.192372	-0.476424	-0.65778	-0.757153	0.279146	0.256965	0.269263	-0.401971	-0.430783	-0.687165	-0.921303	-0.855666	-0.867501
1314	30	0.076961	-0.0481404	0.079735	-0.537854	-0.588787	-0.703198	-0.220647	-0.174353	-0.198451	-0.465215	-0.687165	-0.872274	0.288931	0.219938	0.276115	-0.41098	-0.500875	-0.736055	-0.89404	-0.830113	-0.848632
1319	30	0.123102	0.147558	0.0834216	-0.565634	-0.581606	-0.731888	-0.221894	-0.170788	-0.199671	-0.438505	-0.640555	-0.891598	0.282921	0.24373	0.248421	-0.39601	-0.465215	-0.715393	-0.926341	-0.853316	-0.865122
1325	30	0.0468836	0.0980337	-0.0171462	-0.543005	-0.579818	-0.648174	-0.208255	-0.181522	-0.203341	-0.452557	-0.634878	-0.832409	0.308954	0.270027	0.256965	-0.406466	-0.435409	-0.695149	-0.926341	-0.83933	-0.84397
1330	30	0.0732505	0.125751	0.0411419	-0.565634	-0.603306	-0.61804	-0.211956	-0.170788	-0.198451	-0.492658	-0.621757	-0.802962	0.29565	0.263133	0.255417	-0.409473	-0.420071	-0.677274	-0.886732	-0.83933	-0.825536
1336	30	0.116894	0.146694	0.0639133	-0.543005	-0.574476	-0.693147	-0.176737	-0.192372	-0.194799	-0.473209	-0.659712	-0.811931	0.307485	0.252314	0.270027	-0.424648	-0.446287	-0.721547	-0.931404	-0.881889	-0.886732
1342	30	0.0168571	0.119559	0.0411419	-0.536143	-0.55687	-0.606969	-0.226901	-0.163696	-0.215672	-0.48939	-0.634878	-0.774357	0.311887	0.274597	0.251537	-0.417032	-0.438505	-0.715393	-0.933946	-0.846298	-0.865122
1347	30	0.126633	0.169743	-0.0010005	-0.525939	-0.576253	-0.689155	-0.240798	-0.164875	-0.205795	-0.491023	-0.659712	-0.874669	0.309688	0.256965	0.252314	-0.407968	-0.455706	-0.74866	-0.90634	-0.830113	-0.846298
1353	30	0.128393	0.14583	0.0889262	-0.548181	-0.590591	-0.681219	-0.278392	-0.209487	-0.221894	-0.465215	-0.625489	-0.814186	0.260825	0.261595	0.255417	-0.435409	-0.455706	-0.701179	-0.92887	-0.848632	-0.834711
1358	30	0.0870947	0.116004	0.0129162	-0.563875	-0.59602	-0.644357	-0.211956	-0.216913	-0.218156	-0.522561	-0.665532	-0.858022	0.24059	0.260054	0.270027	-0.447851	-0.432323	-0.697155	-0.911303	-0.825536	-0.820981
1364	30	0.0295588	0.175633	0.0657877	-0.548181	-0.58519	-0.71744	-0.295714	-0.182722	-0.209487	-0.458866	-0.683197	-0.89404	0.263902	0.237441	0.24998	-0.427711	-0.491023	-0.738145	-0.89404	-0.865122	-0.848632
1369	30	0.0667236	0.198031	0.0944007	-0.536143	-0.563875	-0.667479	-0.208255	-0.171975	-0.199671	-0.499226	-0.665532	-0.809681	0.246079	0.266969	0.263133	-0.449417	-0.48939	-0.770028	-0.97551	-0.926341	-0.903868
1375	30	0.0601539	0.168899	0.0870947	-0.53273	-0.563875	-0.715393	-0.262664	-0.176737	-0.214432	-0.458866	-0.646264	-0.855666	0.262364	0.253091	0.218332	-0.41855	-0.470004	-0.752897	-0.931404	-0.853316	-0.867501
1381	30	0.142367	0.1441	0.110647	-0.544727	-0.569161	-0.707246	-0.266573	-0.197232	-0.205795	-0.450986	-0.652005	-0.889162	0.235072	0.256191	0.253867	-0.404965	-0.462035	-0.752897	-0.923819	-0.881889	-0.884308
1386	30	0.0751075	0.152721	0.0971267	-0.539568	-0.565634	-0.642454	-0.214432	-0.169603	-0.202116	-0.491023	-0.691149	-0.798508	0.239017	0.256965	0.232698	-0.430783	-0.481267	-0.691149	-0.913794	-0.872274	-0.86275

## Sheet: Fig 6_map
Well	Strain
A1	Wildtype
A2	Wildtype
A3	Wildtype
A4	p264-oprF-ST
A5	p264-oprF-ST
A6	p264-oprF-ST
B1	p264-oprF-phoA
B2	p264-oprF-phoA
B3	p264-oprF-phoA
B4	p264-oprF-FL1-phoA
B5	p264-oprF-FL1-phoA
B6	p264-oprF-FL1-phoA
C1	p264-oprF-RL1-phoA
C2	p264-oprF-RL1-phoA
C3	p264-oprF-RL1-phoA
C4	p264-oprF-RL2-phoA
C5	p264-oprF-RL2-phoA
C6	p264-oprF-RL2-phoA
D1	p264-oprF-RL3-phoA
D2	p264-oprF-RL3-phoA
D3	p264-oprF-RL3-phoA

## Sheet: Fig 7
Wildtype	p264-oprF-ST	p264-oprF-phoA	p264-oprF-FL1-phoA	p264-oprF-RL1-phoA	p264-oprF-RL2-phoA	p264-oprF-RL3-phoA
54.5558	97.5429	51.2492	78.5394	29.2222	55.8748	121.511
54.2577	98.0318	51.7306	85.8648	24.5898	54.7462	123.12
59.3084	96.8517	52.6406	82.3588	27.0461	64.4776	119.072
